# Supplementary material for: Stable metal–organic frameworks modulated by doping Tb3+ for multi-hazard detection and capture
Source: Royal Society of Chemistry journal article supplement (doi:10.1039/d2me00141a), 2022-11-10
Supplement: d2me00141a1.pdf [file d2me00141a1.pdf]

**Stable metal-organic frameworks modulated by doping Tb<sup>3+</sup> for multi-hazard  
detection and capture**

Yuan Gao<sup>a</sup>, Zhongran Dai<sup>b</sup>, Meng Li<sup>c</sup>, Jixiong Zhang<sup>c</sup>, Stefania Tanase<sup>d\*</sup>, Rongli  
Jiang<sup>a\*</sup>

<sup>a</sup> School of Chemical Engineering and Technology, China University of Mining & Technology, Xuzhou, Jiangsu, 221116, China

<sup>b</sup> Key Discipline Laboratory for National Defense for Biotechnology in Uranium Mining and Hydrometallurgy, University of South China, Hengyang, Hunan, 421001, China

<sup>c</sup> State Key Laboratory of Coal Resources and Safe Mining, School of Mines, China University of Mining & Technology, Xuzhou, Jiangsu, 221116, China

<sup>d</sup> Van 't Hoff Institute for Molecular Sciences, University of Amsterdam, Science Park 904, 1098 XH Amsterdam, The Netherlands

\*Corresponding authors:

Stefania Tanase

E-mail: [s.grecea@uva.nl](mailto:s.grecea@uva.nl);

Rongli Jiang

E-mail: [ronglij@cumt.edu.cn](mailto:ronglij@cumt.edu.cn)

## **Experimental Procedures**

### **Photophysical Measurements**

Samples were prepared for photophysical measurements by grinding the powder products to uniform particle size. Each sample of Tb@UiO-66-(COOH)<sub>2</sub> (1 mg) was suspended in aqueous solutions (2 mL, 10<sup>-3</sup> M~10<sup>-7</sup> M) of M(NO<sub>3</sub>)<sub>z</sub> (M<sup>z+</sup> = Ag<sup>+</sup>, Co<sup>2+</sup>, Ni<sup>2+</sup>, Cu<sup>2+</sup>, Fe<sup>3+</sup>, Sn<sup>4+</sup>, UO<sub>2</sub><sup>2+</sup>), and then sonicated for 10 min to obtain the uniform metal ion-incorporated suspensions for luminescent measurements.

### **UO<sub>2</sub><sup>2+</sup> ion adsorption test**

Note that the UO<sub>2</sub><sup>2+</sup> is present in the form of a complex with a positive charge in solution. Uranyl carbonate becomes predominant species at pH higher than 6.5 and the negative charge of uranyl

carbonate will compromise the adsorption on the MOF's surface. Therefore, we decided to perform the batch experiments in the pH range from 2 to 6. In a typical experiment, 5 mg adsorbent and 30 mL  $\text{UO}_2^{2+}$  ( $50 \text{ mg}\cdot\text{L}^{-1}$ ) solution with appropriate concentration and pH value were added to a 250 mL flask placed in an air bath oscillator (180 rpm) at 308 K. The pH was adjusted with 0.1 M negligible volume of HCl and  $\text{Na}_2\text{CO}_3$ . After adsorption of  $\text{UO}_2^{2+}$ , the residual concentration of  $\text{UO}_2^{2+}$  in the solution was analyzed by UV-Vis and monitoring the absorption at  $\lambda_{\text{max}} = 650 \text{ nm}$  (1 mL Arsenazo (III) as chromogenic agent). The equilibrium adsorption capacity of  $\text{UO}_2^{2+}$  ( $q_e$ ) and the removal efficiency (%) was calculated as follows:

$$q_e = \frac{(C_o - C_e)V}{m} \quad (1)$$

$$(\%) = \frac{(C_o - C_e)}{C_o} \times 100\% \quad (2)$$

where  $C_o$  and  $C_e$  are the initial and equilibrium concentrations of  $\text{UO}_2^{2+}$  (mg/L), respectively,  $V$  is the liquid phase volume (L), and  $m$  is the amount of adsorbent (g). All the flasks were closed to avoid evaporation.

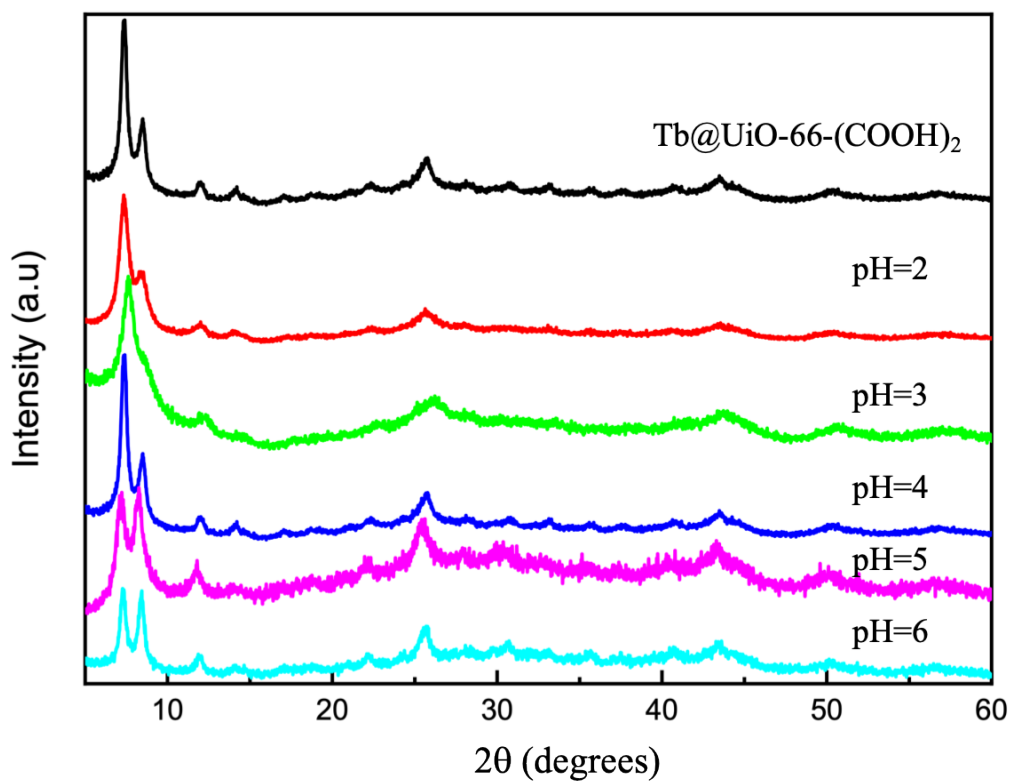

**Fig. S1** PXRD patterns of  $\text{Tb@UiO-66-(COOH)}_2$  after immersion in aqueous solutions at pH values ranging from 2 to 6.

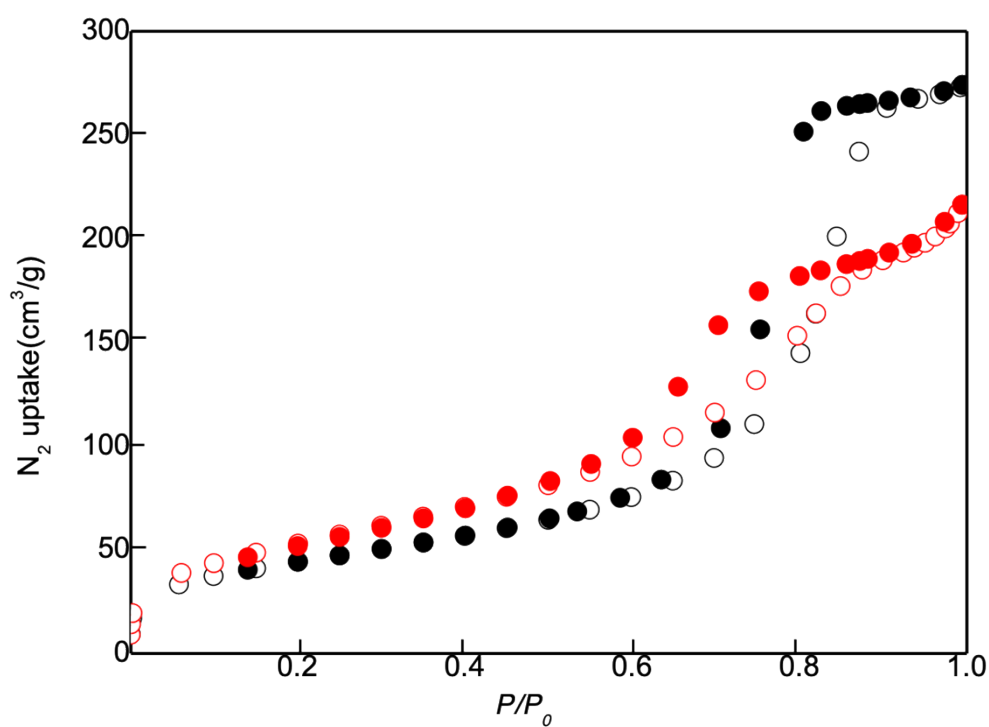

**Fig. S2**  $N_2$  adsorption of UiO-66-(COOH) $_2$  (black) and Tb@UiO-66-(COOH) $_2$  (red).

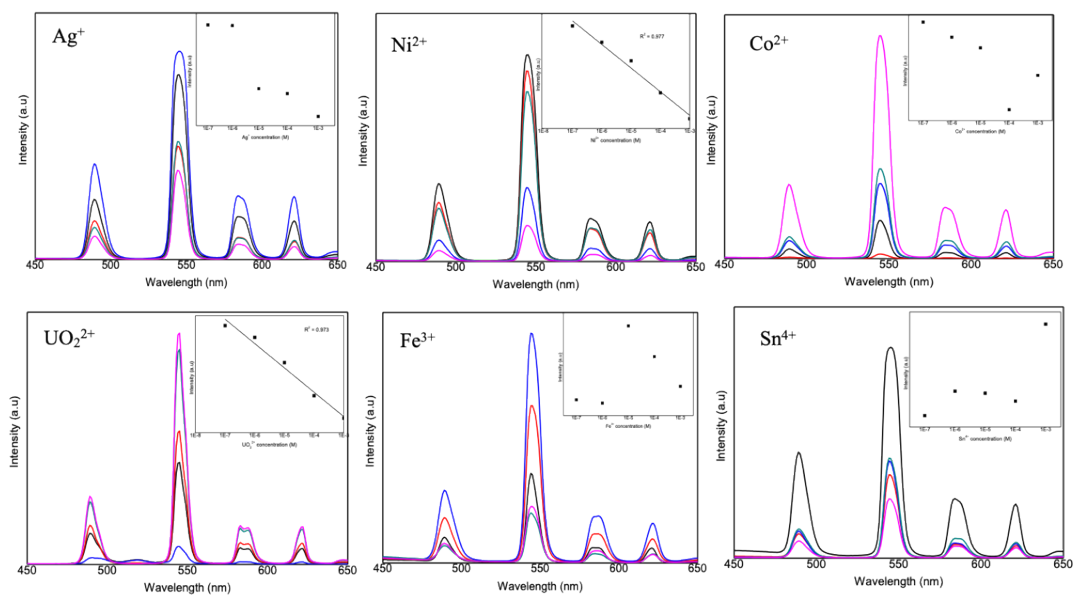

**Fig. S3** Photoluminescent spectra of Tb@UiO-66-(COOH) $_2$  under different concentrations of  $M^{z+}$  aqueous solution ( $M^{z+} = Ag^+, Co^{2+}, Ni^{2+}, Fe^{3+}, Sn^{4+}$  and  $UO_2^{2+}$ ). The inset is the relationship between the luminescence intensity and corresponding ion concentration at 545 nm.

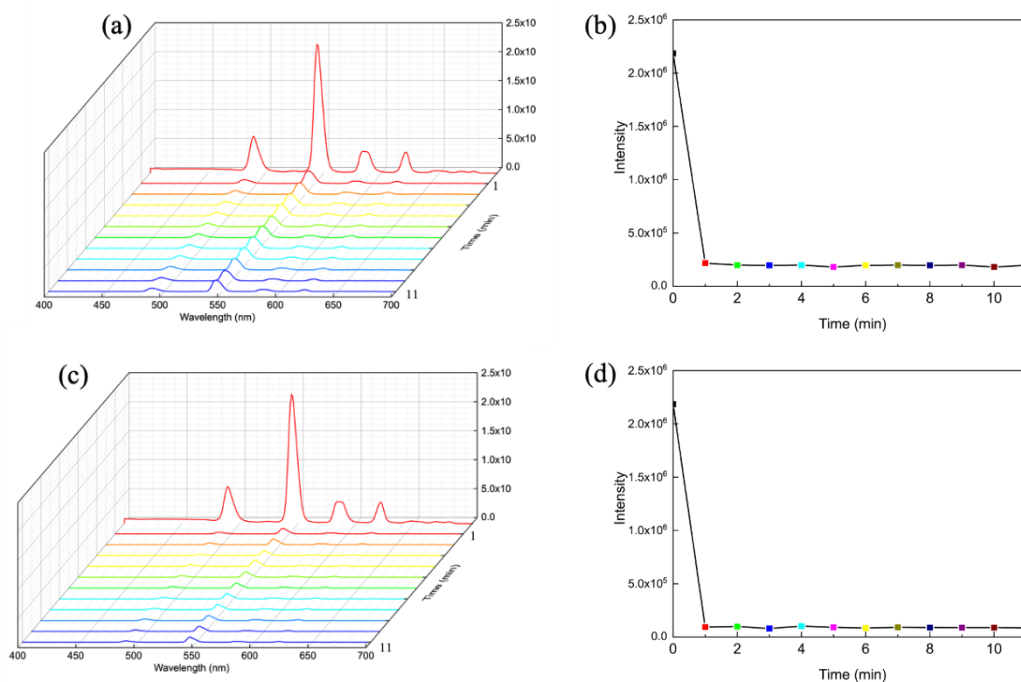

**Fig. S4** Emission spectra of Tb@UiO-66-(COOH)<sub>2</sub> suspensions after addition of 10<sup>-9</sup> M Ni<sup>2+</sup> (a) and UO<sub>2</sub><sup>2+</sup> (c) at various time intervals and the emission intensity at 544 nm as a function of contact time to Ni<sup>2+</sup> (b) and UO<sub>2</sub><sup>2+</sup> (d).

**Table S1**  $K_{sv}$  value of uranium adsorption by reported Ln-MOFs

| MOFs                                                                                                                                                  | $K_{sv} (M^{-1})$   | Ref.      |
|-------------------------------------------------------------------------------------------------------------------------------------------------------|---------------------|-----------|
| [Tb(BPDC) <sub>2</sub> ](CH <sub>3</sub> ) <sub>2</sub> NH <sub>2</sub>                                                                               | $1.03 \times 10^4$  | 1         |
| [Eu <sub>2</sub> (MTBC)(OH) <sub>2</sub> (DMF) <sub>3</sub> (H <sub>2</sub> O) <sub>4</sub> ].2DMF.7H <sub>2</sub> O                                  | 3631.5              | 2         |
| [Ln(ox)(L)] <sub>n</sub> (ox = oxalate, HL = <i>N,N'</i> -dipropionic acid imidazolium, Ln = Eu <sup>3+</sup> )                                       | $6.19 \times 10^4$  | 3         |
| (CH <sub>3</sub> ) <sub>2</sub> NH <sub>2</sub> [Ln <sub>2</sub> (BTC)(AC) <sub>3</sub> (FM)]<br>(H <sub>3</sub> BTC=1,3,5-benzenetricarboxylic acid) | $8.56 \times 10^3$  | 4         |
| Tb@UiO-66-(COOH) <sub>2</sub>                                                                                                                         | $5.994 \times 10^7$ | This work |

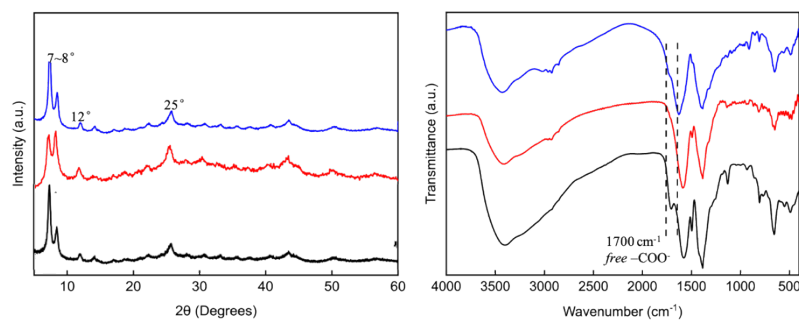

**Fig. S5** The PXRD patterns and FTIR spectra of the Tb@UiO-66-(COOH)<sub>2</sub> (black), Tb@UiO-66-(COOH)<sub>2</sub> treated with Ni<sup>2+</sup> (red) and UO<sub>2</sub><sup>2+</sup> (blue).

1. Ye, J.; Bogale, R. F.; Shi, Y.; Chen, Y.; Liu, X.; Zhang, S.; Yang, Y.; Zhao, J.; Ning, G., A Water-Stable Dual-Channel Luminescence Sensor for UO<sub>2</sub><sup>2+</sup> Ions Based on an Anionic Terbium (III) Metal–Organic Framework. *Chemistry–A European Journal* **2017**, *23* (32), 7657-7662.
2. Liu, W.; Wang, Y.; Song, L.; Silver, M. A.; Xie, J.; Zhang, L.; Chen, L.; Diwu, J.; Chai, Z.; Wang, S., Efficient and selective sensing of Cu<sup>2+</sup> and UO<sub>2</sub><sup>2+</sup> by a europium metal-organic framework. *Talanta* **2019**, *196*, 515-522.
3. Cai, B.; Meng, Y.-N.; Zhu, M.-E.; Yang, Y., Exploiting a new europium (III) coordination polymer based on a zwitterionic ligand as a fluorescent probe for uranyl cations. *Journal of Chemical Research* **2021**, *45* (1-2), 130-135.
4. Wang, M.; Zeng, G.; Zhang, X.; Bai, F. Y.; Xing, Y. H.; Shi, Z., A new family of Ln-BTC-AC-FM framework intelligent materials: Precise synthesis, structure and characterization for fluorescence detecting of UO<sub>2</sub><sup>2+</sup> and adsorbing dyes. *Journal of Molecular Structure* **2021**, *1238*, 130422.
